# Supplementary material for: Study on the catalyst effect of NaCl on MoS2 growth in a chemical vapor deposition process
Source: Royal Society of Chemistry journal article supplement (doi:10.1039/d1ce00525a), 2021-01-01
Supplement: d1ce00525a1.pdf [file d1ce00525a1.pdf]

## Supplementary Information

### Study the Catalyst Effect of NaCl on MoS<sub>2</sub> Growth in Chemical Vapor Deposition Process

Long Chen<sup>a</sup>, Lingyu Zang<sup>a</sup>, Luhua Chen<sup>a</sup>, Jinchao Wu<sup>a</sup>, Chengming  
Jiang<sup>\*,a</sup>, Jinhui Song<sup>\*,a</sup>

<sup>a</sup> School of Mechanical Engineering, Dalian University of  
Technology, Dalian, 116024, China.

\*E-mail: [jiangcm@dlut.edu.cn](mailto:jiangcm@dlut.edu.cn), [jhsong@dlut.edu.cn](mailto:jhsong@dlut.edu.cn)

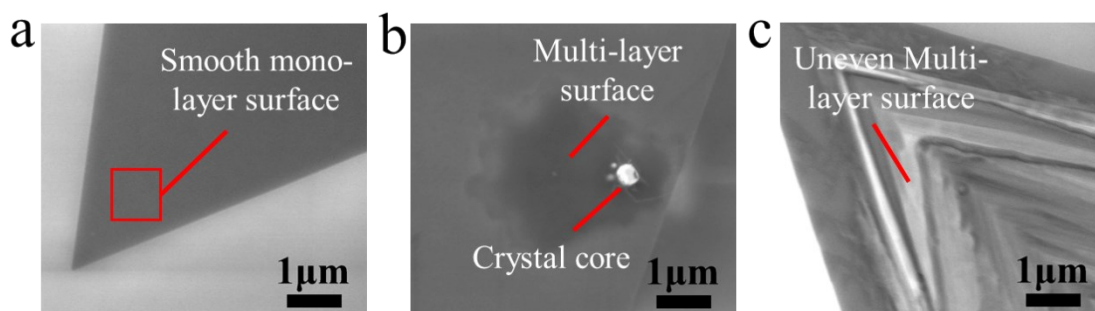

**Fig.S1** Local SEM morphology of the MoS<sub>2</sub> films on the Si/SiO<sub>2</sub> substrate: (a) the mono-layer MoS<sub>2</sub> film, (b) the MoS<sub>2</sub> film with crystal nuclei, and (c) the uneven multi-layer MoS<sub>2</sub> film.

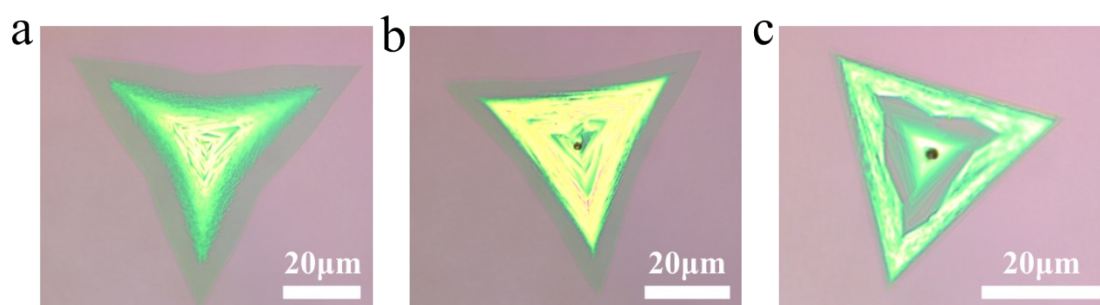

**Fig.S2** Several OM morphologies of the uneven multi-layer MoS<sub>2</sub> films: (a) the triangular pyramid morphology, (b) the mountain-like morphology, and (c) the bumpy morphology.

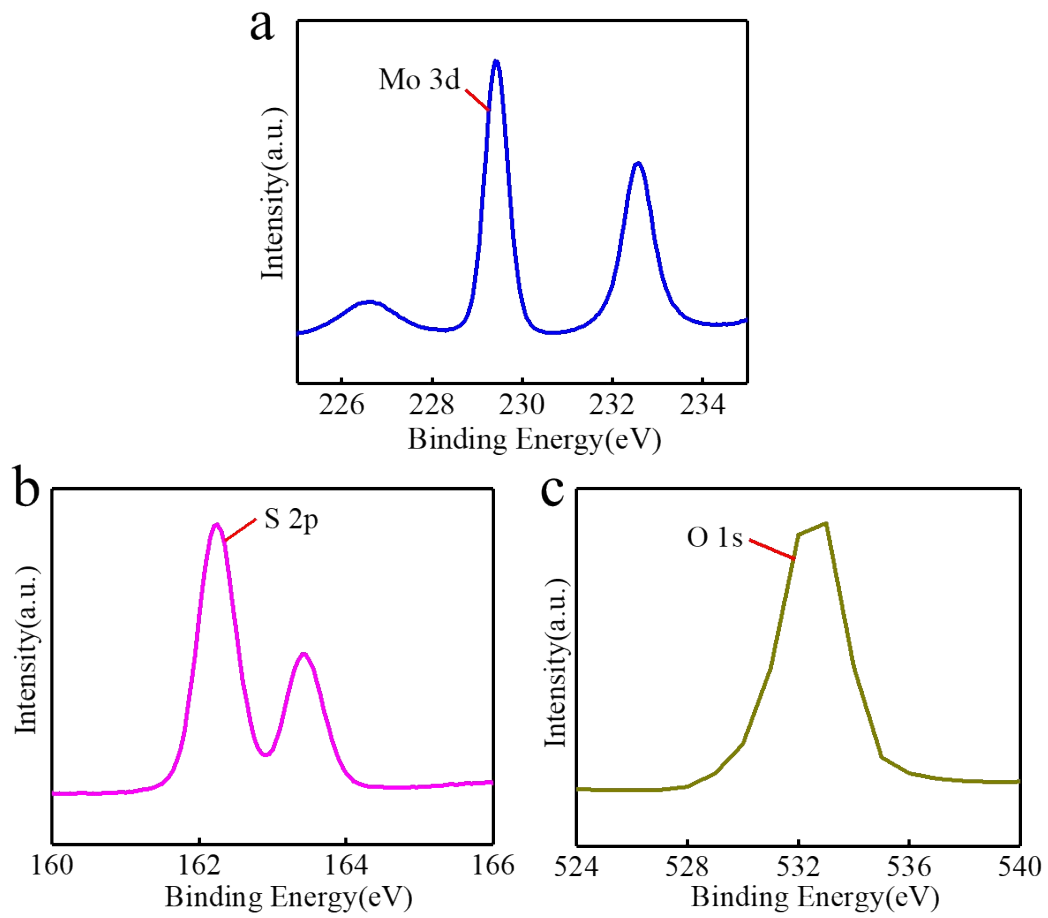

**Fig.S3** On the Si/SiO<sub>2</sub> substrate front region, the XPS spectrum observed by magnification: (a) the Mo 3d, (b) the S 2p and (c) the O 1s.

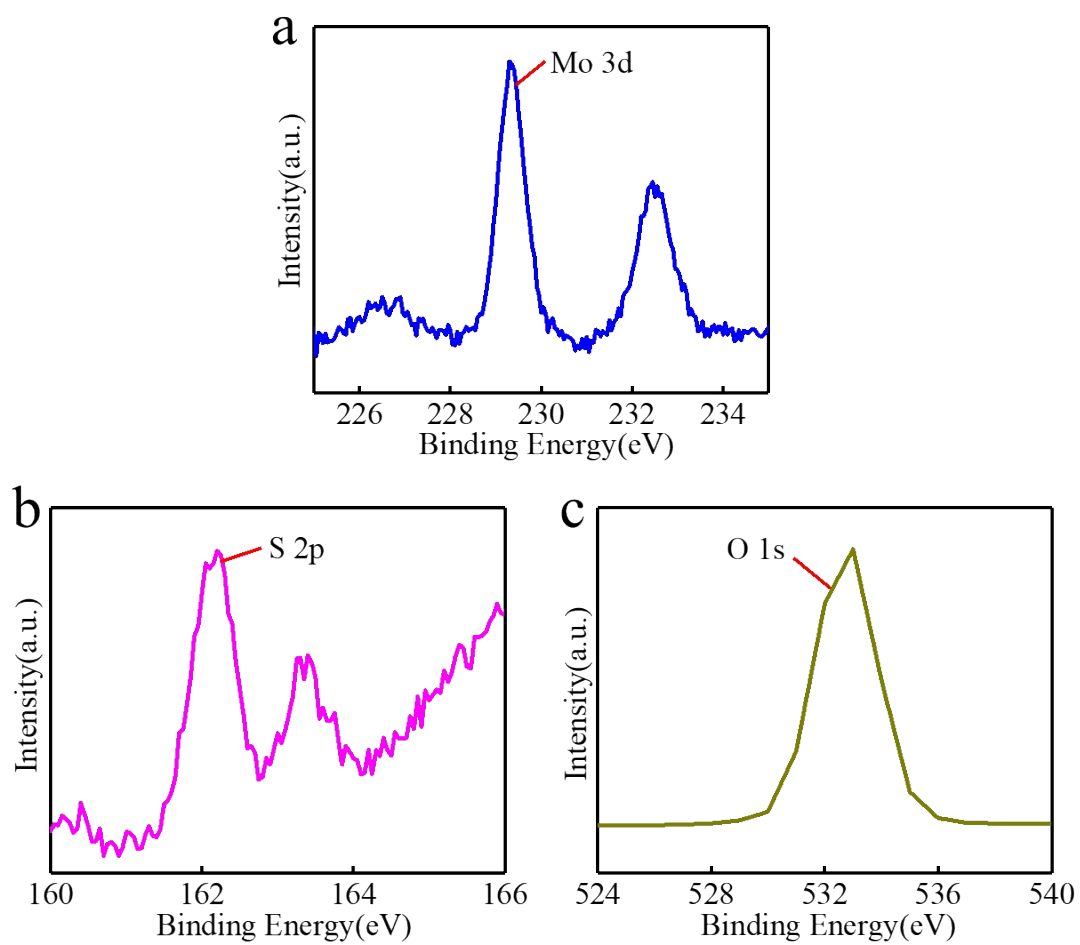

**Fig.S4** On the Si/SiO<sub>2</sub> substrate back region, the XPS spectrum observed by magnification: (a) the Mo 3d, (b) the S 2p and (c) the O 1s.

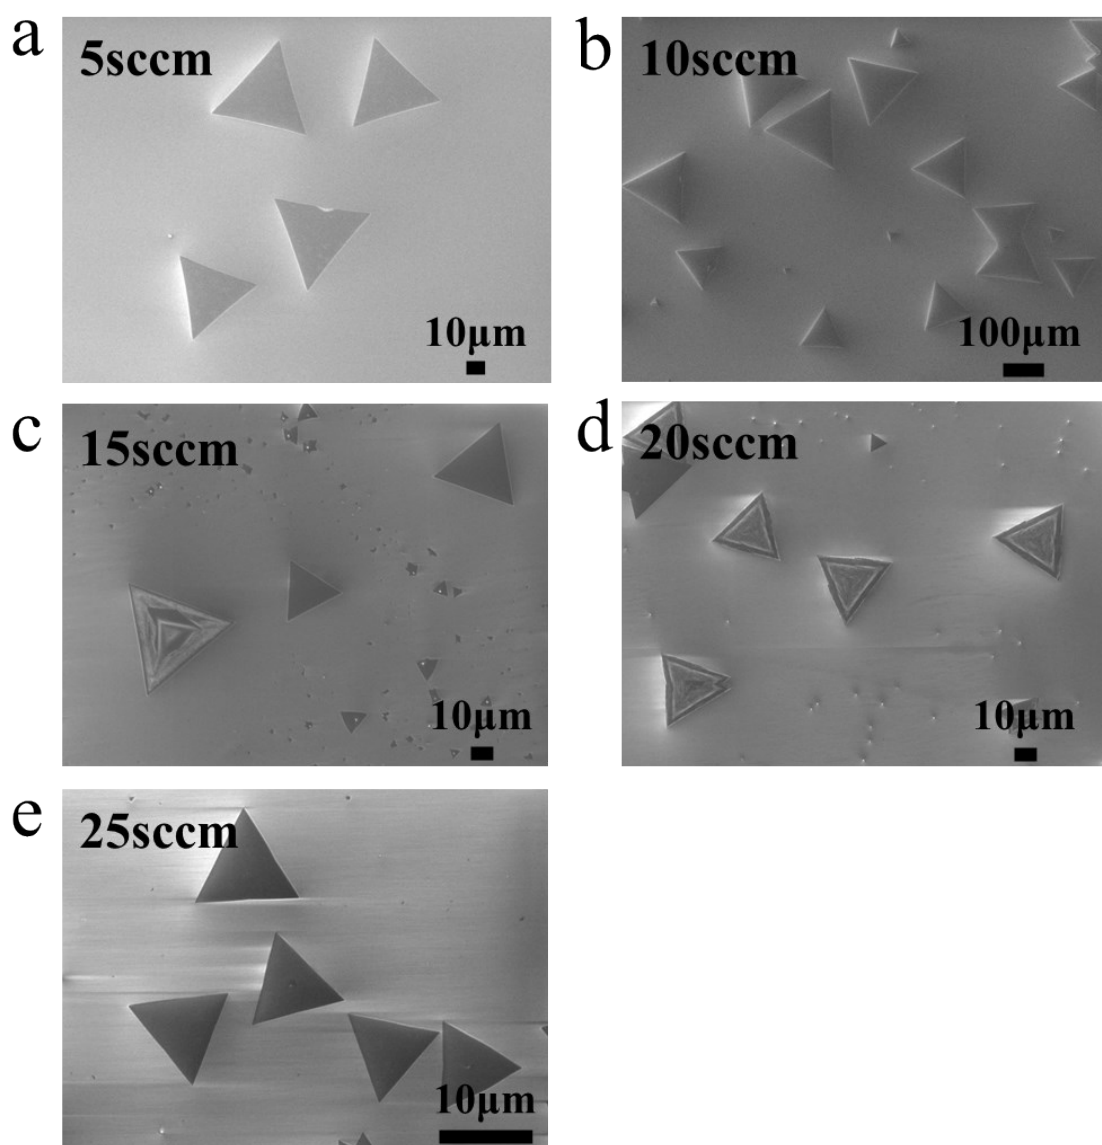

**Fig.S5** Under different carrier gas flow rates, the SEM morphology of the MoS<sub>2</sub> films in the part of the Si/SiO<sub>2</sub> substrate back zone: (a) 5sccm, (b) 10sccm, (c) 15sccm, (d) 20sccm, (e) 25sccm.

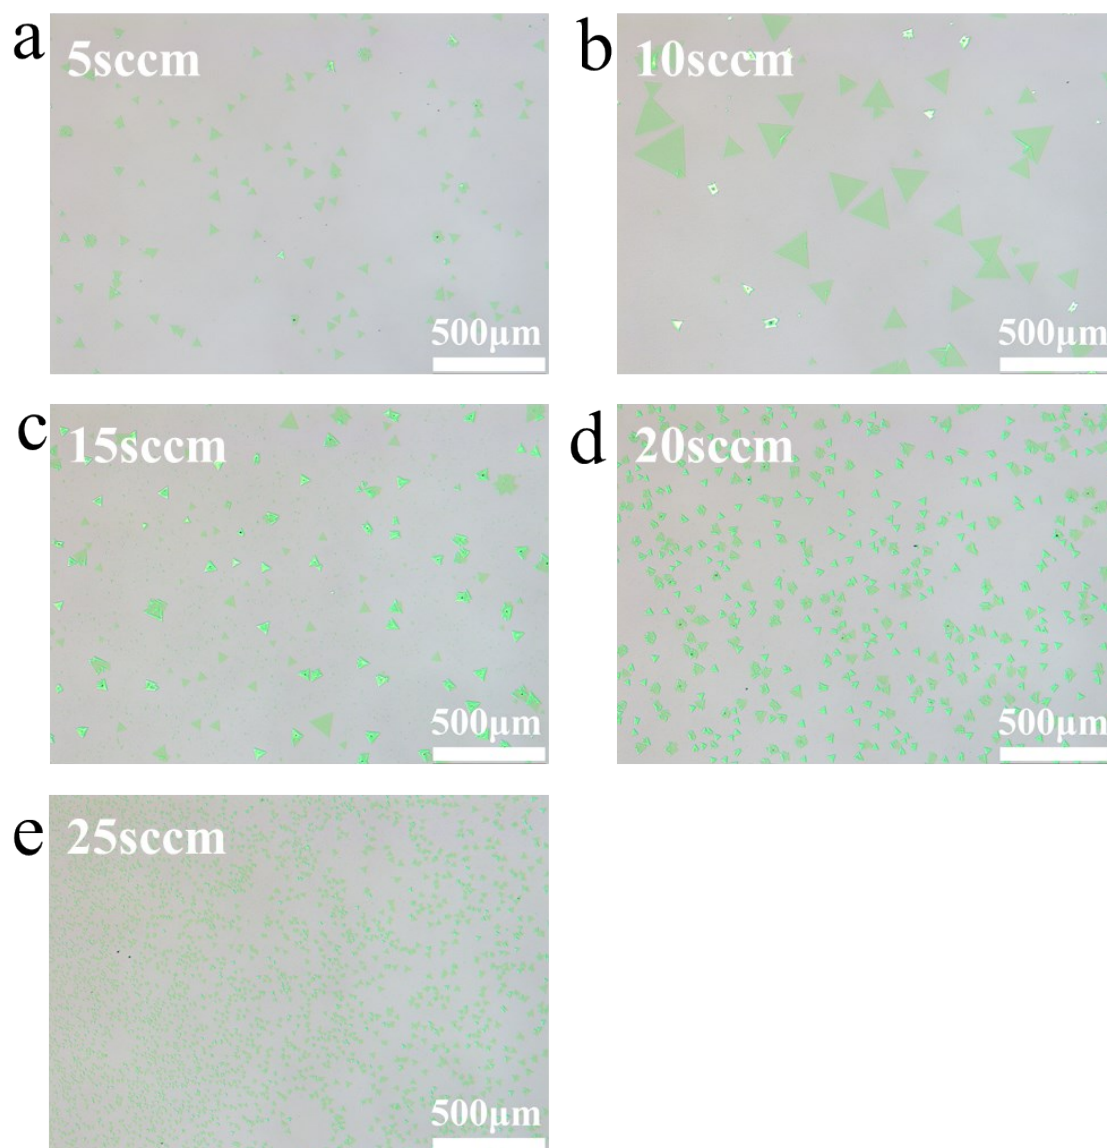

**Fig.S6** Under different carrier gas flow rates, the OM morphology of MoS<sub>2</sub> films in the mono-layer rate statistics zone: (a) 5sccm, (b) 10sccm, (c) 15sccm, (d) 20sccm, (e) 25sccm.
